# Supplementary material for: A plant-derived natural photosynthetic system for improving cell anabolism
Source: Springer Nature journal article supplement (doi:10.1038/s41586-022-05499-y), 2022-12-07
Supplement: MOESM1 [file 41586_2022_5499_MOESM1_ESM.pdf]

---

**Supplementary information**

---

**A plant-derived natural photosynthetic system for improving cell anabolism**

---

In the format provided by the  
authors and unedited

## **Supplementary Text**

### **Superior tissue penetration of the CM-NTUs**

By detecting the fluorescence intensity in the chondrocytes and residual solution after coculture, we found the fluorescence intensity reached the highest value after 1 hour of CM-NTU stimulation, gradually decreased after replacing the fresh culture medium, and reached a plateau after 8 hours (Fig. 2l). The number of NTUs per cell estimated by fluorescence intensity decreased from  $\sim 3.8 \times 10^4$  to  $\sim 2.5 \times 10^4$  in the CM-NTU group in the first 8 hours. However, pretreatment with GW4869 clearly slowed the decrease in fluorescence intensity in chondrocytes (the number of NTUs per cell decreased from  $\sim 3.8 \times 10^4$  to  $\sim 3.3 \times 10^4$  in 8 hours; Fig. 2l). Furthermore, the fluorescence signal in the non-fluorescently labeled medium could appear during the process of culturing, and the CM-NTU group had a significantly higher fluorescence signal ( $\sim 1.4 \times 10^4$  NTUs per cell was released into the supernatant) than the CM-NTU + GW4869 group ( $\sim 3.8 \times 10^3$  NTUs released per cell) during the first 8 hours of culturing (Fig. 2m).

### **The CM-NTUs improve cell anabolism**

We compared the differences in ATP production by NTUs *in vitro* (cell-free) and *in vivo* (cell), and the results showed that NTUs increased the cellular ATP concentration at a rate of  $5.2 \times 10^5$  ATP  $\text{s}^{-1}$  per cell, which is slower than the theoretical value of ATP that NTUs can produce in cells (calculated according to the number of NTUs in a single cell and the rate at which NTUs produce ATP *in vitro*). We speculate that the difference between the actual value and the theoretical value is because of the difference between reaction systems (such as substrate and cofactor concentrations).
